# Supplementary material for: Malnutrition Risk among Older Mexican Adults in the Mexican Health and Aging Study
Source: MDPI journal article supplement (doi:10.3390/nu13051615), 2021-05-12
Supplement: s1 [file s1]

**Table S1.** Weighted Sample Characteristics of older Mexican adults in the 2012 MHAS.

| <b>Characteristics</b>        | <b>N</b> | <b>%</b> |
|-------------------------------|----------|----------|
| <b>Sex</b>                    |          |          |
| Male                          | 5703     | 46.0     |
| Female                        | 7635     | 54.0     |
| <b>Age</b>                    |          |          |
| 50-59                         | 4391     | 46.1     |
| 60-69                         | 5020     | 31.8     |
| 70+                           | 3927     | 22.1     |
| <b>Education years</b>        |          |          |
| 0                             | 2276     | 16.4     |
| 1-6                           | 6929     | 50.9     |
| 7+                            | 4073     | 32.7     |
| <b>Insurance Status</b>       |          |          |
| IMSS, ISSSTE, Other           | 1622     | 53.7     |
| Seguro Popular                | 3800     | 31.4     |
| Uninsured                     | 1622     | 14.9     |
| <b>Locality Size</b>          |          |          |
| More Urban                    | 7876     | 50.3     |
| Less Urban                    | 5382     | 49.7     |
| <b>Self-reported Health</b>   |          |          |
| Excellent, Very good, or Good | 4786     | 37.1     |
| Fair                          | 6813     | 50.3     |
| Poor                          | 1736     | 12.3     |
